# Supplementary material
Source: Research Square preprint supplement (doi:10.21203/rs.3.rs-9994220/v1)
Supplement: Supplementary file 1 [file 7e55e94da45df33361fd63a7.docx]

**Impact of Online Learning, Distance Education, and E-Learning on Learning Effectiveness in Indonesian Higher Education: Quantitative Analysis**

**Torang Siregar *1 [
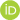
](https://orcid.org/0009-0006-1416-0461)**

*Department of Mathematics Education, Faculty of Tarbiyah and Teacher Training (FTIK), UIN Syekh Ali Hasan Ahmad Addary Padangsidimpuan, Padangsidimpuan, North Sumatra, Indonesia*

Corresponding Author: **Torang Siregar**

E-mail: [torangsiregar966@gmail.com](mailto:torangsiregar966@gmail.com)

ORCID: <https://orcid.org/0009-0006-1416-0461>

**Mhel Cedric D. Bendo 2 [
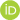
](https://orcid.org/0009-0004-6873-3910)**

*Polytechnic University of the Philippines (PUP), Manila, National Capital Region, Philippines*

E-mail: [cedricbends@gmail.com](mailto:cedricbends@gmail.com)

ORCID: <https://orcid.org/0009-0004-6873-3910>

**ABSTRACT**

The COVID-19 pandemic necessitated an unprecedented global transition from conventional face-to-face instruction to online learning modalities, fundamentally reshaping higher education landscapes. In Indonesia, a vast archipelagic nation comprising over 17,000 islands with significant geographical disparities, this transition addressed long-standing educational access challenges while introducing new pedagogical complexities. This study investigates the effectiveness of online learning, distance education, and e-learning in Indonesian higher education institutions through a quantitative comparative analysis of pre-pandemic and post-pandemic academic outcomes. Employing a cross-sectional survey design, data were collected from 385 undergraduate students across six public and private universities in Sumatra Island, representing diverse disciplinary backgrounds and geographical locations. The research utilized a validated 28-item instrument measuring four effectiveness dimensions: learning flexibility, instructional quality, academic achievement, and student satisfaction. Descriptive analysis revealed that 72.5% of respondents perceived online learning as effective or highly effective, with flexibility (Mean=4.21, SD=0.68) and accessibility (Mean=4.08, SD=0.74) receiving the highest ratings. However, practical skill acquisition (Mean=2.89, SD=0.92) and internet connectivity stability (Mean=2.67, SD=1.03) emerged as significant challenges. Comparative analysis using Mann-Whitney U tests demonstrated no statistically significant difference in Grade Point Average between online and offline learning modalities (p=0.287), indicating that online learning maintains comparable academic outcomes to traditional instruction. Regression analysis identified three significant predictors of online learning effectiveness: digital infrastructure quality (β=0.342, p<0.001), instructor readiness (β=0.287, p<0.001), and student self-regulated learning (β=0.251, p<0.001). These findings contribute empirical evidence supporting online learning as a viable long-term educational strategy for Indonesian higher education, particularly for bridging geographical access gaps. The study recommends blended learning models as optimal approaches combining flexibility benefits with practical skill development requirements.

**Keywords:** Distance education; e-learning effectiveness; higher education; Indonesia; online learning

**1. INTRODUCTION**

The COVID-19 pandemic significantly disrupted global education, affecting approximately 1.6 billion learners across 194 countries and accelerating the adoption of digital learning in higher education worldwide (UNESCO, 2020; Bao, 2020; Al-Fraihat, Joy, & Sinclair, 2020). In Indonesia, the transition to online learning involved approximately 8.5 million university students and more than 300,000 lecturers who were required to shift rapidly from conventional face-to-face instruction to fully online learning (Al-Maroof, R. S., Alhumaid, K., Akour, I., & Salloum, S., 2021). Although initially implemented as an emergency response, this transition gradually evolved into more structured and sustainable online learning practices. (Emihovich, B. (2024)

Indonesia's unique geographical characteristics as an archipelagic nation with over 17,000 islands present longstanding challenges to equitable access to higher education. Significant disparities remain between urban and rural areas, with only 23.5% of individuals aged 19–23 years participating in higher education and enrollment gaps exceeding 40 percentage points (Badan Pusat Statistik, 2023). Online learning offers potential solutions to these geographical barriers by enabling students to access education without relocating to major urban centers. (Al-Fraihat, D., Joy, M., Masa’deh, R., & Sinclair, J., 2020)

The pandemic effectively transformed all Indonesian higher education institutions into distance education providers through government policies, including Ministry of Education and Culture Circular Letter No. 4 of 2020. However, institutional readiness varied considerably (Cheah, S., & Li, S., 2020). While some universities had established e-learning systems and digital infrastructure, others had limited experience with online education (Colthorpe, K., Gray, H., Ainscough, L., & Ernst, H., 2021). Previous research identified learning collaboration quality, information quality, and course content support as important determinants of e-learning success in Indonesian universities (Sewandono et al., 2023; DeLone & McLean, 2003).

As online learning practices matured beyond emergency implementation, evaluating their effectiveness became increasingly important for informing post-pandemic educational policies. Existing studies have produced mixed findings. Nadeak (2020) reported that online learning was effective for theoretical courses but less suitable for practical instruction, whereas Pariyanto et al. (2025) found improvements in student academic performance and learning accessibility in online environments. These contrasting results suggest that online learning effectiveness depends on factors such as implementation quality, institutional support, and student characteristics. (Gezani, B. (2024)

Many previous studies focused on single institutions, limiting the generalizability of findings across Indonesia’s diverse higher education landscape (Emihovich, B. (2024). To address this gap, the present study investigates online learning effectiveness across multiple universities in Sumatra. Specifically, it aims to: (1) examine student perceptions of online learning effectiveness in terms of flexibility, instructional quality, academic achievement, and satisfaction; (2) compare academic outcomes between online and offline learning modalities; and (3) identify significant predictors of online learning success (Alisherovna, M. N., 2025). The study contributes to the literature through a comprehensive post-pandemic evaluation involving multiple institutions, the integration of perceptual and academic outcome measures, representation of diverse geographical contexts, and the identification of actionable factors for optimizing online learning implementation.

**2. LITERATURE REVIEW**

**2.1 Theoretical Foundations of Online Learning Effectiveness**

The theoretical framework for online learning effectiveness draws from multiple established educational theories. The connectivity learning theory, articulated by Siemens (2005), posits that learning in digital environments occurs through network formation wherein learners navigate decentralized information sources to construct knowledge (Bachtiar, B., 2025). This perspective is particularly relevant for Indonesian higher education, where students must often independently manage learning across geographical and technological constraints .

Connectivism represents a departure from earlier learning theories that assumed knowledge resides primarily within instructors or textbooks (Bin Mubayrik, H. F., 2020). In the connectivist view, learning involves developing the ability to navigate information networks, evaluate source credibility, synthesize distributed information, and continuously update knowledge as information evolves (Boström, L., Collén, C., Damber, U., & Gidlund, U., 2021). This theoretical perspective aligns well with the realities of online learning, where students encounter information from multiple sources—instructor-generated content, peer contributions, external websites, multimedia resources—and must actively construct coherent understanding from these distributed inputs.

For Indonesian students, connectivist skills prove particularly valuable given the variable quality of internet connectivity (Davis, 1989). When live synchronous participation proves impossible due to connection interruptions, students who have developed strong network-navigation skills can access recorded materials, participate in asynchronous discussions, and independently locate supplementary resources to maintain learning momentum (Wong, J. Y., et al., 2024 & Yunus, M., et al., 2025). Conversely, students who expect knowledge to be delivered directly by instructors without their active network navigation may struggle when connectivity limitations disrupt traditional instructional patterns. (Bin Mubayrik, H. F., 2020)

The practical implications of connectivism for Indonesian higher education include emphasizing digital literacy development, teaching students effective strategies for online information seeking and evaluation, designing learning activities that require network navigation rather than passive content consumption, and assessing students' ability to synthesize distributed information rather than merely recall instructor-provided content. (Fanshawe, M., Delaney, N., & Powell, A. (2020)

The technology acceptance model (Davis, 1989) provides complementary insights, suggesting that perceived usefulness and perceived ease of use determine technology adoption and continued utilization. Within online learning contexts, students who perceive learning management systems as useful for achieving academic goals and easy to navigate demonstrate higher engagement and satisfaction. Sewandono et al. (2023) extended this framework to Indonesian e-learning contexts, demonstrating that perceived usefulness significantly mediates the relationship between system quality and performance expectancy. (Fanshawe, M., Delaney, N., & Powell, A. (2020)

The technology acceptance model has particular relevance for understanding student engagement with online learning in the Indonesian context. Perceived usefulness refers to students' belief that using a particular technology will enhance their academic performance (Chan, A. H., et al., 2022). When students view online learning platforms as facilitating better understanding, more efficient studying, or improved grades, they are more likely to engage actively with these platforms. Perceived ease of use refers to students' belief that using the technology requires minimal effort (Gezani, B. (2024). Platforms that are intuitive, responsive, and reliable reduce the frustration that can undermine sustained engagement. (Wong, J. Y., et al., 2024 & Yunus, M., et al., 2025)

Research applying the technology acceptance model to Indonesian educational contexts has consistently found that perceived usefulness exerts stronger influence on behavioral intention than perceived ease of use. This pattern suggests that Indonesian students are willing to tolerate some technological difficulty if they believe the platform ultimately benefits their learning (Hollingshead, A. (2021). However, when perceived usefulness is low—when students view online learning as neither improving nor maintaining their academic outcomes—even perfectly functioning platforms fail to generate sustained engagement (Neroni, J., Meijs, C., Gijselaers, H. J. M., Kirschner, P. A., & de Groot, R. H. M., 2019). This finding underscores the importance of demonstrating value to students through clear learning outcomes, engaging content, and meaningful assessments. (Kim, Y., & Olesova, L. (2022)

Cultural factors may influence technology acceptance patterns in Indonesia compared to Western contexts. Indonesian students in collectivist cultural environments may place greater emphasis on social influence—perceptions that valued others (peers, instructors, family) believe online learning is worthwhile—than individualistic Western students (Hollingshead, A. (2021). This cultural characteristic suggests that institutional strategies for promoting online learning adoption should include peer endorsement, visible instructor commitment, and family communication about the value of online educational modalities. (Gezani, B. (2024)

DeLone and McLean's information systems success model offers comprehensive evaluation dimensions including system quality, information quality, service quality, user satisfaction, and net benefits. Applied to online learning, this model suggests that learning management system reliability, course content quality, instructor support, student satisfaction, and learning outcomes collectively determine e-learning success. Cidral et al. (2018) validated this model across higher education contexts, finding all dimensions significantly impact perceived e-learning effectiveness. (Hollingshead, A. (2021)

The DeLone and McLean model provides a particularly useful framework for evaluating online learning because it recognizes that success is multidimensional rather than reducible to any single indicator. System quality encompasses technical dimensions including platform reliability, loading speed, uptime, and feature functionality. Information quality addresses the accuracy, timeliness, completeness, and relevance of course content (Kim, Y., & Olesova, L. (2022). Service quality refers to the support students receive from instructors, technical staff, and administrative personnel. User satisfaction captures students' affective responses to their online learning experiences. Net benefits represent the ultimate outcomes including learning achievement, skill development, and career preparation. (Liu, Y., & Zhang, H., 2022)

Applying this multidimensional framework to Indonesian higher education reveals that even institutions with adequate system quality may fail to achieve online learning success if information quality or service quality is deficient. A perfectly functioning learning management system populated with poorly organized, outdated, or irrelevant course materials will not produce positive outcomes (Koenka, A. C., & Anderman, E. M., 2019). Similarly, excellent course content accessed through an unstable, frequently crashing platform frustrates students regardless of content quality. Successful online learning requires balanced attention to all five dimensions rather than overemphasis on any single aspect. (Liu, Y., & Zhang, H., 2022)

The service quality dimension deserves particular attention in the Indonesian context, where instructor-student relationships often carry cultural significance beyond information transmission. Indonesian students typically expect accessible, supportive instructors who provide guidance beyond minimum requirements (Liu, Y., & Zhang, H., 2022). When online learning environments reduce instructor availability or responsiveness, students may perceive diminished service quality even when system and information quality remain adequate (Kim, Y., & Olesova, L. (2022). This finding suggests that maintaining strong instructor presence and accessibility constitutes a critical success factor for Indonesian online learning.

**2.2 Online Learning Implementation in Indonesia**

Indonesia's distance education history predates the COVID-19 pandemic by several decades, with Universitas Terbuka established in 1984 as a dedicated open university serving students across the archipelago. Research by Yunus and Bachtiar (2025) examining Universitas Terbuka's open and distance learning system found that structured feedback—combining instructor-generated, automated, and peer responses—substantially enhances learner autonomy, motivation, and academic performance in distance education contexts . (UNESCO, 2020)

Universitas Terbuka's four decades of distance education experience offer valuable lessons for conventional universities transitioning to online learning. The institution developed sophisticated systems for print-based and radio-based instruction before internet technologies became widely available, demonstrating that effective distance education depends more on pedagogical design than on technological sophistication (Koenka, A. C., & Anderman, E. M., 2019). Key lessons from the Universitas Terbuka experience include the importance of self-instructional materials designed for independent study, regular formative assessment with prompt feedback, regional learning centers providing local support, and flexible scheduling accommodating work and family responsibilities. (Liu, Y., & Zhang, H., 2022)

However, important differences exist between Universitas Terbuka's distance education model and the online learning implemented by conventional universities during the pandemic. Universitas Terbuka was explicitly designed for distance delivery from its founding, with curriculum, assessment methods, and support systems all aligned with independent learning. Conventional universities, in contrast, adapted existing face-to-face courses for online delivery, often without fundamentally rethinking pedagogical approaches (Koenka, A. C., & Anderman, E. M., 2019). Course materials designed for classroom discussion and immediate instructor feedback may not translate effectively to online environments. Assessment methods developed for proctored, in-person settings require modification for remote administration. This distinction between "born digital" and "emergency adapted" online learning helps explain variation in effectiveness across institutions. (Medeshova., Kassymova., Mutalova, Z., & Kamalova, G., 2022)

The Universitas Terbuka experience also demonstrates the value of student support systems extending beyond academic instruction. Regional learning centers provide physical spaces for student meetings, examination administration, and tutorial sessions. Peer learning communities form around geographic proximity rather than course enrollment (Koenka, A. C., & Anderman, E. M., 2019). These social supports complement formal instruction and address the isolation that distance education students may experience. Conventional universities transitioning to online learning might similarly benefit from establishing local support structures rather than assuming fully remote instruction suffices. (Weru, N., 2023 & Winarno, et al., 2023)

Conventional universities demonstrated variable e-learning readiness prior to 2020. Research by Azis et al. (2020) identified that while most universities had adopted learning management systems, actual utilization remained limited to administrative functions rather than transformative pedagogical integration. The pandemic thus required rapid capability building across instructor digital literacy, infrastructure development, and pedagogical adaptation. (Kuluakli, E., 2023) & Leontyeva, I. A.k 2018)

The phenomenon of learning management system adoption without pedagogical integration represents a common pattern in higher education internationally, not merely in Indonesia. Universities purchase or develop platforms, require faculty to upload syllabi and post grades, but stop short of fundamentally redesigning courses for online delivery (Spitzer and Musslick, 2021). Faculty members fulfill minimum requirements by posting static content—PDFs of lecture slides, scanned reading assignments, links to external resources—while continuing to conceptualize their teaching as fundamentally classroom-based. Students access these materials but experience no fundamental change in how learning occurs. (Neroni, J., Meijs, C., Gijselaers, H. J. M., Kirschner, P. A., & de Groot, R. H. M., 2019)

The pandemic disrupted this pattern by removing the classroom entirely, forcing faculty who had previously treated learning management systems as supplementary file repositories to develop genuine online teaching capabilities. Faculty who had never recorded a video lecture learned screencasting software (Spitzer and Musslick, 2021). Instructors who had never facilitated online discussion developed strategies for asynchronous forums. Assessment methods designed for closed-book, in-person exams were redesigned for open-book, remote administration (Weru, N., 2023 & Winarno, et al., 2023). This forced capability building, while stressful, generated lasting improvements in digital pedagogical skills across the Indonesian higher education sector. (Kuluakli, E., 2023) & Leontyeva, I. A.k 2018)

The speed of this transition meant that capability building occurred through trial and error rather than systematic professional development. Faculty learned by doing, often without formal training or mentoring support (Medeshova., Kassymova., Mutalova, Z., & Kamalova, G., 2022). While many developed effective online teaching strategies through this experiential process, others struggled throughout the pandemic without adequate institutional support. The variation in faculty readiness captured in the present study's instructor readiness predictor reflects this uneven professional development experience. (Spitzer and Musslick, 2021)

Digital infrastructure disparities across Indonesian regions represent persistent challenges. While urban Java institutions typically maintain adequate internet connectivity, universities in Sumatra, Kalimantan, and eastern Indonesia face bandwidth limitations and inconsistent service (Weru, N., 2023 & Winarno, et al., 2023). Heo et al. (2024) identified that technological barriers significantly constrain online learning participation in outer islands, with students reporting connectivity interruptions affecting synchronous learning activities and timely assessment submission. (Kuluakli, E., 2023) & Leontyeva, I. A.k 2018)

The digital infrastructure disparities across Indonesian regions are not merely matters of convenience but fundamentally affect educational equity. Students in well-connected urban areas can participate fully in synchronous learning activities, access streaming video content, submit assignments reliably, and engage in real-time collaboration with peers (Spitzer and Musslick, 2021). Students in poorly-connected rural areas face interrupted participation, inability to access bandwidth-intensive materials, delayed assignment submission, and limited collaborative engagement (Medeshova., Kassymova., Mutalova, Z., & Kamalova, G., 2022). When course designs assume reliable connectivity, rural students face systematic disadvantage regardless of their motivation or academic ability. (Weru, N., 2023 & Winarno, et al., 2023)

Quantifying the scale of these disparities provides important context. According to data from the Indonesian Internet Service Providers Association, average internet speeds in urban West Java exceed 25 Mbps, while average speeds in rural Papua fall below 2 Mbps. Data costs also vary dramatically, with mobile data in remote areas costing up to five times urban rates. For a student in rural North Sumatra, participating in a two-hour synchronous video session might consume data costing the equivalent of a full day's wage for their family. Even when connectivity exists, economic barriers constrain participation. (Neroni, J., Meijs, C., Gijselaers, H. J. M., Kirschner, P. A., & de Groot, R. H. M., 2019)

The present study's finding that 92.1% of students rely on smartphones as primary access devices reflects economic realities of Indonesian internet access. Smartphones offer more affordable connectivity than desktop computers or laptops, and mobile data plans often provide more flexible purchasing options than fixed broadband subscriptions (Medeshova., Kassymova., Mutalova, Z., & Kamalova, G., 2022). However, smartphone-only access presents limitations including smaller screens complicating detailed content viewing, reduced multitasking capability, battery life constraints, and reliance on mobile networks rather than more reliable fixed connections (Neroni, J., Meijs, C., Gijselaers, H. J. M., Kirschner, P. A., & de Groot, R. H. M., 2019). Designing online learning for smartphone-dominant access requires different approaches than designing for desktop access, including mobile-optimized platforms, reduced bandwidth requirements, and offline-capable materials.

**2.3 Empirical Evidence on Online Learning Effectiveness**

International evidence regarding online learning effectiveness has accumulated substantially during the pandemic period. Meta-analyses by Spitzer and Musslick (2021) found positive correlations between e-learning and academic achievement across K-12 and higher education contexts, suggesting that well-designed online instruction can match or exceed traditional classroom outcomes. However, effectiveness varies significantly by discipline, with theoretical courses generally more amenable to online delivery than laboratory-based or clinical instruction. (Prawisanthi, T. A., et al., 2023 & Qassrawi, R., 2022)

The meta-analytic finding that online learning effectiveness varies by discipline reflects fundamental differences in learning objectives across fields. Theoretical disciplines emphasizing conceptual understanding, critical analysis, and written expression adapt relatively easily to online delivery (Mitchell, C., Cours Anderson, K., Laverie, D., & Hass, A. (2021). Students can read texts, watch recorded lectures, participate in discussion forums, and complete written assignments as effectively online as in person. Indeed, online environments may enhance certain theoretical learning outcomes through asynchronous discussion that allows more reflective participation than real-time classroom conversation. (Prawisanthi, T. A., et al., 2023 & Qassrawi, R., 2022)

In contrast, disciplines requiring psychomotor skill development face inherent challenges in fully online delivery. Medical and nursing students must develop clinical examination skills requiring physical practice with patients or simulators. Engineering students must gain laboratory experience with physical equipment (Mitchell, C., Cours Anderson, K., Laverie, D., & Hass, A. (2021). Performing arts students must develop embodied performance skills requiring real-time feedback. These disciplines have developed creative remote solutions during the pandemic—including simulated patients, at-home laboratory kits, and video submission for performance critique—but evidence suggests these substitutes cannot fully replace in-person practical experience. (Prawisanthi, T. A., et al., 2023 & Qassrawi, R., 2022)

This disciplinary variation has important implications for Indonesian higher education policy. Rather than adopting uniform online learning policies across all fields, institutions should consider discipline-specific approaches. Theoretical courses in humanities, social sciences, business, and law may be delivered effectively fully online, enabling access expansion for students unable to attend physical campuses (Mitchell, C., Cours Anderson, K., Laverie, D., & Hass, A. (2021). Practical courses in health sciences, engineering, and performing arts may be better served by blended models combining online theory instruction with intensive in-person practical sessions. The present study's finding that skill development received the lowest effectiveness rating (Mean=2.89) confirms the particular challenge of practical disciplines in online environments.

Within Indonesia, research findings have been mixed but increasingly supportive of online learning viability. Mothibi (2015) conducted meta-analysis indicating positive correlation between e-learning and academic achievement in higher education. The study by Pariyanto et al. (2025) analyzing 321 Indonesian university students found notable GPA improvement of 2.75 or lower in online settings compared to offline learning, though no significant differences were observed for higher GPA ranges. Students reported online learning as more understandable, offering readily available multimodal resources and providing additional learning time. (Surbakti, R., et al., 2024 & Svihus, C. L., 2024)

The finding that lower-GPA students benefit more from online learning than higher-GPA students deserves careful interpretation. Several mechanisms may explain this differential effect. First, online learning's asynchronous nature enables self-pacing, allowing struggling students to allocate additional time to challenging concepts without the social pressure of falling behind peers in a classroom setting. Students who feel embarrassed asking questions publicly may feel more comfortable seeking help through private online channels (Ismailov, M., & Chiu, T. K. F. (2022). The recorded lecture access that benefits all students may disproportionately benefit struggling students who need to review challenging content multiple times. (Weru, N., 2023 & Winarno, et al., 2023)

Second, online learning reduces the social comparison that can demoralize lower-performing students in traditional classrooms. In face-to-face settings, students observe peers answering questions quickly, completing assignments efficiently, and receiving instructor praise (Ismailov, M., & Chiu, T. K. F. (2022). Struggling students who compare themselves unfavorably to high-performing peers may develop negative academic self-concept that undermines motivation. Online environments reduce these social comparison cues, potentially enabling struggling students to focus on their own learning progress rather than relative standing. (Lin, L., & Barber, K. A., 2022)

Third, online learning's written communication emphasis may benefit students who process information more effectively through reading and writing than through listening and speaking. Traditional classrooms often privilege auditory learning and verbal participation, potentially disadvantaging students with different learning preferences. Online environments that emphasize written discussion, text-based resources, and asynchronous interaction may better accommodate diverse learning styles. (Lin, L., & Barber, K. A., 2022)

These potential benefits of online learning for struggling students depend on adequate support structures. Without reliable connectivity, instructor availability, and self-regulation skills, struggling students may fall further behind rather than catching up (Marisa, Putri, D. A. P., Mujiono, & Jameel, A. H., 2024). The present study's identification of digital infrastructure quality and student self-regulated learning as significant effectiveness predictors underscores that modality alone does not determine outcomes; implementation quality matters critically. (Mitchell, C., Cours Anderson, K., Laverie, D., & Hass, A. (2021)

Challenges remain significant. Research by Georgia and Teny (2025) found that while online learning provides flexibility benefits, student engagement and motivation require intentional design and support. Practical skill acquisition poses particular difficulties, with laboratory courses and clinical rotations requiring specialized remote solutions. The study by Yunus and Bachtiar (2025) emphasized that formative, low-stakes assessments with clear rubrics and timely feedback are critical to perceived fairness, motivation, and retention in distance learning contexts . (Ismailov, M., & Chiu, T. K. F. (2022)

**2.4 Research Gap and Conceptual Framework**

Synthesizing previous literature reveals several gaps motivating this research. First, most Indonesian online learning effectiveness studies focused on single institutions during emergency remote teaching periods, limiting generalizability. Second, previous research predominantly examined perceptual outcomes rather than objective academic performance comparisons. Third, systematic investigation of factors predicting online learning success in the Indonesian post-pandemic context remains limited. (Lin, L., & Barber, K. A., 2022)

This research addresses these gaps through a conceptual framework positioning digital infrastructure, instructor readiness, and student self-regulated learning as independent variables, with online learning effectiveness as dependent variable operationalized through flexibility, instructional quality, academic achievement, and satisfaction dimensions. (Marisa, Putri, D. A. P., Mujiono, & Jameel, A. H., 2024)

The conceptual framework guiding this research draws upon the theoretical foundations discussed above while incorporating context-specific factors relevant to Indonesian higher education (Hu, J., Lee, P. G., & Harji, M. A. B. (2023). Digital infrastructure quality encompasses both technical dimensions (connectivity stability, device availability, platform reliability) and economic dimensions (data affordability, device access equity). Instructor readiness includes both technical dimensions (digital platform proficiency, content creation capability) and pedagogical dimensions (online engagement strategies, feedback practices, presence maintenance). Student self-regulated learning comprises goal-setting ability, time management skill, help-seeking behavior, and persistence in independent study. (Marisa, Putri, D. A. P., Mujiono, & Jameel, A. H., 2024)

The relationship among these variables is hypothesized as partially mediated rather than fully direct. Digital infrastructure quality influences online learning effectiveness both directly—by enabling smooth platform access and content engagement—and indirectly—by affecting student motivation and instructor capability to deliver effectively (Hu, J., Lee, P. G., & Harji, M. A. B. (2023). Similarly, instructor readiness influences effectiveness directly through instructional quality and indirectly through student engagement and satisfaction. Student self-regulated learning influences effectiveness directly through academic behaviors and indirectly through resource utilization and help-seeking. (Lin, L., & Barber, K. A., 2022)

This framework recognizes that online learning effectiveness emerges from interaction among technological, instructional, and learner factors rather than from any single factor in isolation (Marisa, Putri, D. A. P., Mujiono, & Jameel, A. H., 2024). Even excellent infrastructure fails to produce learning without skilled instruction and motivated students. Even excellent instruction cannot overcome connectivity barriers that prevent content access (Hu, J., Lee, P. G., & Harji, M. A. B. (2023). Even highly self-regulated students struggle when courses are poorly designed for online delivery. This systems perspective informs both the study's methodology and its practical recommendations.

**3. METHODOLOGY**

**3.1 Research Design**

This study employed a **quantitative** cross-sectional survey design with comparative and predictive components. The **quantitative approach** enabled systematic measurement of online learning effectiveness across multiple dimensions and statistical examination of relationships between predictor variables and effectiveness outcomes (Creswell, J. W., & Plano Clark, V. L., 2011). Data were collected during the 2024–2025 academic year, representing the post-pandemic stabilization period when institutions had largely transitioned from emergency remote teaching to structured online or blended learning models.

Although the cross-sectional design offers efficiency and supports large-scale data collection, it cannot establish causal relationships among variables. For example, the association between digital infrastructure quality and online learning effectiveness may reflect either the influence of infrastructure on learning outcomes or students’ positive perceptions of online learning influencing their evaluation of infrastructure (Wong, J. Y., et al., 2024 & Yunus, M., et al., 2025). Nevertheless, the selected timeframe provided an appropriate balance between capturing mature online learning practices and ensuring that students could still meaningfully compare their online experiences with prior offline learning.

The study also incorporated a comparative component by examining students’ pre-pandemic GPA (offline learning) and current GPA (online or hybrid learning). This within-subject comparison controls for individual characteristics such as academic ability, motivation, and prior achievement, thereby providing stronger evidence regarding differences between learning modalities than comparisons based on separate student groups.


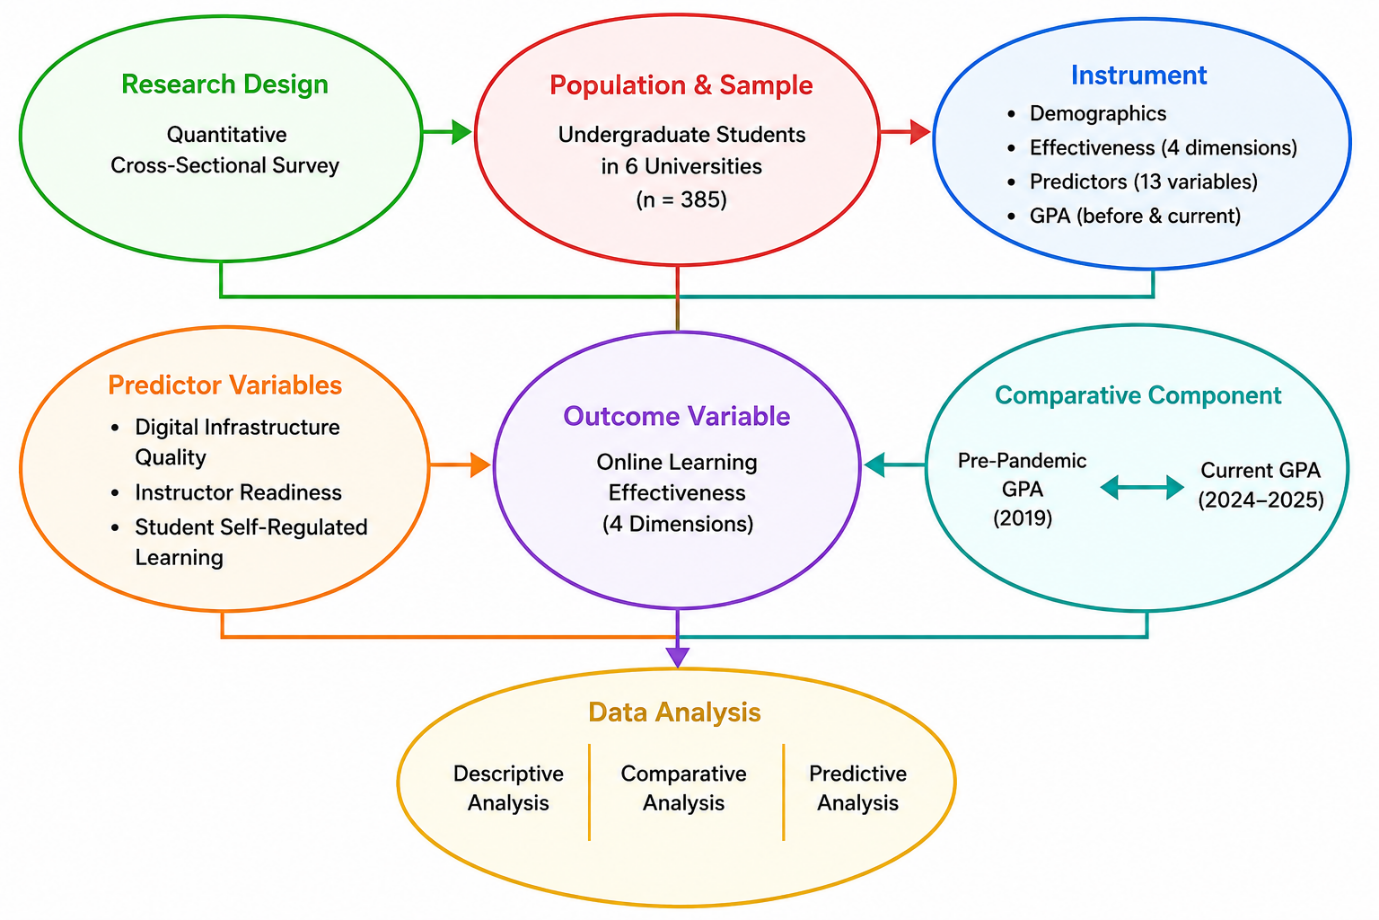


**Figure 1:** Research Design (Creswell, J. W., & Plano Clark, V. L., 2011)

**3.2 Population and Sample**

The target population consisted of undergraduate students enrolled in Indonesian higher education institutions during the post-pandemic period. Stratified random sampling was used to ensure representation across university types, geographical locations, and academic disciplines. The sample was drawn from six universities in Sumatra, including three public institutions (UIN Syekh Ali Hasan Ahmad Addary Padangsidimpuan, STAIN Mandailing Natal, and AKBID Negeri Sigulang) and three private institutions (Graha Nusantara University, Universitas Muhammadiyah Tapanuli Selatan, and IPTS Padangsidimpuan).

Sumatra was selected because it offers substantial diversity in infrastructure, urban-rural settings, and institutional characteristics while remaining feasible for research coordination. However, the findings should be interpreted cautiously, as regions in Eastern Indonesia may face different infrastructural, cultural, and educational conditions that were not captured in this study.

To ensure disciplinary representation, the sample included students from sciences, social sciences, and humanities. Sample size determination using Krejcie and Morgan’s table indicated a minimum requirement of 381 respondents from an estimated population of 45,000 students. A total of 420 questionnaires were distributed through online and offline channels, resulting in 385 valid responses after data cleaning, yielding a response rate of 91.7% (Badan Pusat Statistik, 2023). Respondents comprised 58.7% females and 41.3% males, with a mean age of 21.4 years (SD = 1.8).

**3.3 Research Instrument**

The research instrument comprised a 28-item questionnaire developed through adaptation of validated instruments from previous studies. The questionnaire was structured into four sections:

**Section A: Demographic Information** (6 items) capturing gender, age, university type, year of study, discipline, and residential location.

**Section B: Online Learning Effectiveness Dimensions** (16 items) measuring four sub-dimensions with four items each: (1) Learning Flexibility (e.g., "Online learning allows me to study at my own pace"), (2) Instructional Quality (e.g., "Course materials are well-organized and accessible"), (3) Academic Achievement (e.g., "Online learning helps me achieve learning objectives"), and (4) Student Satisfaction (e.g., "I am satisfied with my online learning experience"). Items utilized 5-point Likert scales (1=Strongly Disagree to 5=Strongly Agree).

**Section C: Predictor Variables** (6 items) measuring: (1) Digital Infrastructure Quality (internet connectivity, device availability, platform stability), (2) Instructor Readiness (digital teaching skills, responsiveness, feedback quality), and (3) Student Self-Regulated Learning (time management, goal setting, independent learning ability).

**Section D: Academic Outcomes** collected self-reported GPA before pandemic (2019) and current GPA (2024-2025), enabling within-subject comparison of academic performance across modalities.

The research instrument was developed by adapting validated measures from previous studies on online learning effectiveness, including those of Al-Fraihat et al. (2020) and Cidral et al. (2018), to suit the Indonesian higher education context. Content validity was established through expert review involving specialists in educational technology, research methodology, and online learning. Based on their feedback, several items were revised for clarity and redundancy reduction.

Pilot testing was conducted with 45 students from non-sampled institutions to assess reliability, item clarity, and questionnaire administration procedures. Cronbach’s alpha coefficients ranged from 0.82 to 0.91, indicating excellent internal consistency. Minor revisions were made to several items following student feedback regarding ambiguous wording. (Vlachopoulos, D., et al., 2019 & Warren, S. J., et al., 2022)

Academic performance data were collected using self-reported GPA rather than official records to facilitate broader participation and reduce administrative constraints. To minimize reporting bias, respondents were assured of confidentiality and instructed to provide their exact GPA values. Overall, the instrument demonstrated satisfactory validity and reliability for measuring online learning effectiveness and its associated predictors.

**3.4 Data Collection Procedures**

Data were collected over a 12-week period from September to November 2024 following approval from the research ethics committees of participating universities. Informed consent was obtained from all participants, including information regarding study objectives, voluntary participation, confidentiality, and the right to withdraw at any time.

Questionnaires were distributed through university learning management systems, official student communication channels, and limited in-person administration to ensure participation from students with varying levels of internet access. Data collection was scheduled outside examination periods and major holidays to maximize response quality and participation rates. Reminder messages were sent every two weeks throughout the data collection period. (Vlachopoulos, D., et al., 2019 & Warren, S. J., et al., 2022)

Ethical principles guided all procedures. Participation was voluntary, no incentives were provided, and all identifying information was removed before analysis to ensure confidentiality. Access to data was restricted to the principal investigators, and participant anonymity was maintained throughout the study.

**3.5 Data Analysis Techniques**

Data were analyzed using SPSS version 29 in three stages: descriptive, comparative, and predictive analysis. Descriptive statistics included means, standard deviations, frequencies, and percentages. Online learning effectiveness scores were categorized as Very Low (1.00–1.75), Low (1.76–2.50), Moderate (2.51–3.25), High (3.26–4.00), and Very High (4.01–5.00).

Comparative analysis employed nonparametric tests because Kolmogorov-Smirnov results indicated non-normal GPA distributions (p < 0.05). Wilcoxon signed-rank tests were used to compare pre-pandemic and current GPA, while Mann-Whitney U tests examined differences in effectiveness perceptions across demographic groups.

Predictive analysis used multiple linear regression with simultaneous entry to assess the effects of digital infrastructure quality, instructor readiness, and student self-regulated learning on online learning effectiveness. Regression assumptions were evaluated through tests of normality (Shapiro-Wilk), multicollinearity (Variance Inflation Factor), homoscedasticity (Breusch-Pagan), and independence of errors (Durbin-Watson). Results indicated that all assumptions were satisfactorily met, supporting the validity of the regression model.

**4. RESULTS**

**4.1 Descriptive Analysis of Online Learning Effectiveness**

Table 1 presents descriptive statistics for online learning effectiveness dimensions across 385 respondents.

**Table 1.** Descriptive Statistics of Online Learning Effectiveness Dimensions

| Dimension | Mean | Standard Deviation | Category |
| --- | --- | --- | --- |
| Learning Flexibility | 4.21 | 0.68 | Very High |
| Accessibility | 4.08 | 0.74 | Very High |
| Instructional Quality | 3.64 | 0.82 | High |
| Course Material Organization | 3.58 | 0.79 | High |
| Instructor Responsiveness | 3.42 | 0.88 | High |
| Academic Achievement | 3.38 | 0.85 | High |
| Learning Objective Attainment | 3.35 | 0.81 | High |
| Skill Development | 2.89 | 0.92 | Moderate |
| Student Satisfaction | 3.56 | 0.84 | High |
| Overall Effectiveness | 3.64 | 0.71 | High |

Online learning effectiveness was rated high overall (Mean = 3.64, SD = 0.71). Learning flexibility received the highest score (Mean = 4.21, SD = 0.68), followed by accessibility (Mean = 4.08, SD = 0.74), indicating that students highly value the temporal and geographical advantages of online learning. In contrast, skill development was rated at a moderate level (Mean = 2.89, SD = 0.92), suggesting ongoing challenges in developing practical competencies through online instruction.

Overall, 72.5% of respondents (n = 279) perceived online learning as “Effective” or “Highly Effective,” while 27.5% (n = 106) rated it as “Moderately Effective” or “Less Effective.” No respondents classified online learning as “Not Effective,” reflecting broad acceptance of online learning modalities.

The findings suggest that flexibility and accessibility represent the primary strengths of online learning in the Indonesian higher education context. However, the relatively lower rating for skill development indicates that practical and hands-on competencies remain difficult to achieve through fully online approaches. While no respondents reported online learning as ineffective, this result should be interpreted cautiously due to the possibility of response bias (Vlachopoulos, D., et al., 2019 & Warren, S. J., et al., 2022). Nevertheless, the absence of significant GPA differences between learning modalities provides additional support for the overall effectiveness of online learning.

**4.2 Infrastructure and Connectivity Analysis**

Internet connectivity stability represents the most significant technical challenge reported. Table 2 presents connectivity patterns across residential locations.

**Table 2.** Internet Connectivity Stability by Residential Location

| Residential Location | Stable Connection (%) | Unstable Connection (%) | Primary Access Device |
| --- | --- | --- | --- |
| Urban (n=187) | 78.6 | 21.4 | Smartphone (89.3%) |
| Suburban (n=123) | 56.1 | 43.9 | Smartphone (94.2%) |
| Rural (n=75) | 32.0 | 68.0 | Smartphone (97.3%) |
| Total (N=385) | 61.3 | 38.7 | Smartphone (92.1%) |

Substantial disparities in internet connectivity were observed between urban and rural students. While 78.6% of urban students reported stable internet access, only 32.0% of rural students experienced similar reliability, highlighting a significant digital divide that may hinder equitable participation in online learning.

The findings also revealed that smartphones were the primary device for accessing online learning, used by 92.1% of respondents. This indicates that most students depend on mobile internet rather than fixed broadband services, emphasizing the importance of mobile-friendly learning management systems and instructional materials.

These results suggest that online learning may unintentionally reinforce educational inequalities when course designs require stable connectivity, extensive synchronous participation, or high-bandwidth activities. Students in rural areas often face greater technical and financial barriers, including unreliable networks and higher mobile data costs (Surbakti, R., et al., 2024 & Svihus, C. L., 2024). Therefore, mobile-optimized platforms, low-bandwidth learning resources, flexible access options, and offline learning features are essential to ensure equitable access and participation in online education.

**4.3 Comparative Analysis: Online vs. Offline Academic Outcomes**

Wilcoxon signed-rank tests compared paired GPA data from pre-pandemic (offline instruction) and current (online/hybrid instruction) periods. Table 3 presents comparative results.

**Table 3.** Comparison of GPA Between Offline and Online Learning Modalities

| GPA Range | Offline Mean (SD) | Online Mean (SD) | Difference | Z | p-value |
| --- | --- | --- | --- | --- | --- |
| Low (<2.75) (n=78) | 2.48 (0.21) | 2.81 (0.34) | +0.33 | -4.827 | <0.001 |
| Medium (2.75-3.24) (n=142) | 3.02 (0.18) | 3.15 (0.27) | +0.13 | -3.451 | <0.001 |
| High (3.25-3.74) (n=118) | 3.51 (0.16) | 3.48 (0.29) | -0.03 | -1.032 | 0.302 |
| Very High (≥3.75) (n=47) | 3.82 (0.09) | 3.76 (0.31) | -0.06 | -1.214 | 0.225 |
| **Overall (N=385)** | **3.21 (0.53)** | **3.28 (0.48)** | **+0.07** | **-1.065** | **0.287** |

Comparative analysis showed no statistically significant difference in GPA between online and offline learning modalities (Z = -1.065, p = 0.287), indicating that online learning produces academic outcomes comparable to traditional face-to-face instruction.

However, GPA stratification revealed differential effects across student groups. Students with lower GPAs (< 2.75) experienced significant improvement under online learning (Δ = +0.33, p < 0.001), whereas students with higher GPAs (≥ 3.25) maintained stable performance across both modalities. This finding suggests that the flexibility and self-paced nature of online learning may particularly benefit academically struggling students without disadvantaging high-achieving learners.

These results indicate the potential of online learning to support educational equity by helping lower-performing students improve while preserving the academic performance of stronger students. Nevertheless, the observed GPA gains should be interpreted cautiously, as factors such as differences in assessment practices, grading policies, course characteristics, and student maturation may also have contributed to the changes (Surbakti, R., et al., 2024 & Svihus, C. L., 2024). Overall, the absence of performance decline among high-achieving students suggests that the competencies associated with academic success can be effectively sustained across learning modalities.

**4.4 Predictors of Online Learning Effectiveness**

Multiple linear regression examined relationships between three predictor variables and overall online learning effectiveness. Table 4 presents regression results.

**Table 4.** Multiple Regression Analysis of Online Learning Effectiveness Predictors

| Predictor Variable | B | SE | β | t | p-value | VIF |
| --- | --- | --- | --- | --- | --- | --- |
| (Constant) | 0.842 | 0.156 |  | 5.397 | <0.001 |  |
| Digital Infrastructure Quality | 0.342 | 0.048 | 0.348 | 7.125 | <0.001 | 1.342 |
| Instructor Readiness | 0.287 | 0.052 | 0.291 | 5.519 | <0.001 | 1.487 |
| Student Self-Regulated Learning | 0.251 | 0.049 | 0.255 | 5.123 | <0.001 | 1.365 |

Note: R=0.684, R²=0.468, Adjusted R²=0.463, F(3,381)=111.47, p<0.001, Durbin-Watson=1.892

The regression model demonstrated strong explanatory power, accounting for 46.8% of the variance in online learning effectiveness (R² = 0.468; Adjusted R² = 0.463). The model was statistically significant (F = 111.47, p < 0.001), while diagnostic tests confirmed acceptable assumptions, including independence of errors (Durbin-Watson = 1.892) and absence of multicollinearity (VIF < 2.0).

All three predictor variables significantly influenced online learning effectiveness. Digital infrastructure quality emerged as the strongest predictor (β = 0.348, p < 0.001), followed by instructor readiness (β = 0.291, p < 0.001) and student self-regulated learning (β = 0.255, p < 0.001). These findings indicate that both institutional factors and learner characteristics play important roles in determining online learning success.

The results highlight the importance of investing in reliable digital infrastructure and faculty preparedness, as these factors contribute more strongly to effectiveness than individual student characteristics alone. Nevertheless, the model left 53.2% of the variance unexplained, suggesting that additional factors—such as course design quality, institutional support services, peer interaction, and prior online learning experience—may also influence online learning effectiveness. (Surbakti, R., et al., 2024 & Svihus, C. L., 2024)

From a practical perspective, the positive coefficient for digital infrastructure quality indicates that improvements in connectivity, device access, and platform reliability are likely to enhance students’ perceptions of online learning effectiveness. (Hojeij, Z., & Ayber, P. O. (2022)

**4.5 Perceived Benefits and Challenges**

Open-ended responses were thematically analyzed to identify perceived benefits and challenges of online learning. Table 5 summarizes the most frequently mentioned themes.

**Table 5.** Thematic Analysis of Perceived Benefits and Challenges

| Category | Theme | Frequency (%) | Representative Quote |
| --- | --- | --- | --- |
| **Benefits** | Schedule flexibility | 312 (81.0) | "I can study at any time, which helps because I work part-time" |
|  | Reduced commuting costs | 287 (74.5) | "Saving transportation money and time traveling to campus" |
|  | Access to recorded lectures | 256 (66.5) | "Being able to rewatch lectures helps me understand difficult concepts" |
|  | Comfortable learning environment | 223 (57.9) | "Studying from home reduces anxiety about speaking in class" |
| **Challenges** | Internet connectivity | 298 (77.4) | "Signal drops frequently during synchronous sessions" |
|  | Practical skill limitations | 267 (69.4) | "Cannot practice laboratory techniques properly online" |
|  | Reduced peer interaction | 241 (62.6) | "Missing casual discussions with classmates between classes" |
|  | Eye strain/fatigue | 198 (51.4) | "Too much screen time makes me tired and less focused" |

Schedule flexibility (81.0%) and reduced commuting costs (74.5%) were the most frequently reported benefits of online learning, highlighting its value for students balancing academic, work, and family responsibilities. Access to recorded lectures (66.5%) was also viewed positively, as it allowed students to review course materials and learn at their own pace.

These advantages, connectivity challenges remained the most commonly reported problem (77.4%), particularly among students in rural areas. Practical skill limitations (69.4%) and reduced peer interaction (62.6%) were also identified as major concerns. These findings suggest that while online learning enhances accessibility and flexibility, it may be less effective for courses requiring hands-on practice and direct social engagement.

The qualitative responses further emphasized that online learning reduces financial burdens associated with transportation and commuting while increasing educational access. However, unstable internet connections can disrupt participation in synchronous activities, and the lack of opportunities for practical training and peer interaction may negatively affect learning experiences (Hojeij, Z., & Ayber, P. O. (2022). These results indicate that future online or blended learning models should prioritize reliable connectivity, opportunities for practical skill development, and mechanisms to strengthen student interaction and engagement.

**5. DISCUSSION**

**5.1 Interpretation of Findings**

This study's findings contribute empirical evidence supporting online learning as an effective instructional modality for Indonesian higher education, while identifying critical success factors and persistent challenges requiring systematic attention.

The finding that 72.5% of students perceive online learning as effective or highly effective, combined with comparable academic outcomes to offline instruction (p=0.287), challenges initial skepticism regarding online learning viability in developing country contexts. This finding extends previous research by Pariyanto et al. (2025), who reported GPA improvements in online settings, and aligns with international evidence that well-designed online instruction can match traditional classroom outcomes.

The flexibility dimension's highest rating (Mean=4.21) confirms that online learning's primary value proposition—enabling study anytime, anywhere—resonates strongly with Indonesian students. For a nation where students often commute long distances or balance work and study, this flexibility represents genuine educational access expansion rather than mere convenience. (Emihovich, B. (2024)

The significant connectivity urban-rural gap (78.6% vs 32.0% stable connections) reveals persistent digital divide challenges requiring policy intervention. While online learning theoretically promises to bridge geographical barriers, infrastructure disparities risk exacerbating rather than reducing educational inequities if unaddressed. This finding supports Heo et al. (2024), who identified technological barriers as critical constraints for outer island students.

The finding that online learning achieves comparable academic outcomes to traditional instruction while providing flexibility benefits suggests that post-pandemic educational policy should preserve online options rather than mandating complete return to face-to-face instruction (Oyetade, K., Harmse, A., & Zuva, T., 2023). Students who benefited from flexible scheduling—including working students, students with family care responsibilities, and students from geographically remote areas—should not be forced to abandon online learning entirely (Todri, A., et al., 2021 & Topping, K. J., 2023). At the same time, students who struggled with practical skill development or social isolation should have access to in-person options. This balanced approach points toward blended or hybrid models offering choice and flexibility while preserving valuable face-to-face interactions. (Emihovich, B. (2024)

The urban-rural connectivity gap presents a policy challenge requiring multi-stakeholder solutions. Individual institutions cannot single-handedly resolve national infrastructure disparities. However, institutions can adapt their online learning designs to accommodate connectivity limitations (Oyetade, K., Harmse, A., & Zuva, T., 2023). Strategies include providing offline-capable materials, reducing synchronous session requirements, offering asynchronous alternatives for bandwidth-intensive activities, and designing assessments that do not assume stable real-time connectivity (Hojeij, Z., & Ayber, P. O. (2022). Partnerships with telecommunications providers could secure subsidized data plans for economically disadvantaged students. Government investment in rural connectivity infrastructure remains essential, but institutional adaptations can mitigate infrastructure gaps while awaiting systemic improvements. (Wong, J. Y., et al., 2024 & Yunus, M., et al., 2025)

**5.2 Differential Effects Across Academic Performance Levels**

The finding that lower-performing students (GPA<2.75) improved significantly under online learning while higher-performing students maintained their performance has important implications for educational equity. This pattern may reflect several mechanisms.

First, online learning's asynchronous nature enables self-pacing, allowing struggling students to allocate additional time to challenging concepts without classroom-based social comparison pressures. Second, recorded lecture access enables concept review as needed, supporting mastery learning approaches less feasible in traditional classrooms where instruction progresses uniformly. Third, reduced social anxiety in online environments may benefit students who hesitate to ask questions publicly. (Oyetade, K., Harmse, A., & Zuva, T., 2023)

This differential effect suggests that online learning may serve as an equity-enhancing tool, potentially reducing performance gaps between high and low achievers. However, this benefit requires adequate support structures including reliable connectivity, instructor availability, and student self-regulation development. (Todri, A., et al., 2021 & Topping, K. J., 2023)

The equity-enhancing potential of online learning identified in this study carries both optimistic and cautionary implications. Optimistically, the finding suggests that thoughtfully implemented online learning could help narrow Indonesia's substantial educational achievement gaps (Maypa, A. L. Z., Marcial, D. E., & Montemayor, J. O., 2023). Students who previously fell behind due to factors beyond their control—including work schedules, family obligations, geographical isolation, or learning pace mismatches—may find online environments more accommodating. The GPA improvement of +0.33 among low-GPA students, if sustained and generalizable, represents meaningful progress toward educational equity. (Oyetade, K., Harmse, A., & Zuva, T., 2023)

Caution is warranted, however, because the same differential effects that benefit struggling students under supportive conditions could harm them under unsupportive conditions. Online learning environments that lack adequate support structures—reliable connectivity, responsive instructors, clear expectations, self-regulation training—may exacerbate rather than reduce performance gaps (Zhong, Q., Wang, Y., Lv, W., Xu, J., & Zhang, Y., 2022). Struggling students who need the most support may be least equipped to succeed independently when support is absent (Maypa, A. L. Z., Marcial, D. E., & Montemayor, J. O., 2023). The significant improvement observed in this study occurred in the context of structured online learning during the post-pandemic stabilization period, not during the chaotic emergency remote teaching of 2020. This distinction matters for policy: online learning's equity potential depends on implementation quality, not modality alone. (Weru, N., 2023 & Winarno, et al., 2023)

The mechanism explanations proposed—self-pacing, recorded lecture access, reduced social anxiety—suggest specific design features that institutions should prioritize. Enabling self-pacing requires flexible assignment deadlines rather than rigid schedules, modular content organization enabling non-sequential access, and assessment systems accommodating variable completion timing (Todri, A., et al., 2021 & Topping, K. J., 2023). Recorded lecture access requires systematic lecture capture and archiving rather than exclusively synchronous delivery. Reducing social anxiety requires private help-seeking channels (direct messaging to instructors, anonymous question forums) and emphasis on mastery rather than competition. (Riau, D., et al., 2023 & Schweighart, R., et al., 2024)

**5.3 Predictors of Effectiveness and Practical Implications**

The regression model identifying digital infrastructure quality, instructor readiness, and student self-regulated learning as significant predictors (R²=0.468) provides actionable guidance for institutional improvement strategies.

Digital infrastructure quality as the strongest predictor (β=0.348) indicates that connectivity investments yield direct effectiveness improvements. For Indonesian higher education, this implies prioritizing: (1) partnership with telecommunications providers for affordable student data plans, (2) development of mobile-optimized learning platforms given smartphone dominance (92.1%), and (3) provision of offline-capable learning materials for low-connectivity regions.

Instructor readiness (β=0.291) emphasizes that technology alone insufficiently ensures quality. Professional development programs should address: (1) digital pedagogical skills beyond platform operation, (2) strategies for maintaining student engagement remotely, and (3) effective feedback mechanisms supporting learner progress. Yunus and Bachtiar (2025) demonstrated that structured feedback combining instructor-generated, automated, and peer responses substantially enhances learner autonomy and academic performance in distance education. (Semenova, L. A., et al., 2023 & Shakra, Z. A., 2023)

Student self-regulated learning (β=0.255) suggests that online learning effectiveness depends partly on learner characteristics. Institutions should integrate self-regulation training into orientation programs, including time management strategies, goal-setting frameworks, and independent learning skills.

The practical implications of the predictor findings extend beyond broad recommendations to specific actionable strategies (Todri, A., et al., 2021 & Topping, K. J., 2023). For digital infrastructure quality, mobile-optimized platform development should include responsive design adapting to various screen sizes, reduced image and video file sizes to minimize data consumption, offline access options allowing content download during connectivity and later access without continuous connection, and simplified navigation requiring minimal typing or precise clicking (Wong, J. Y., et al., 2024 & Yunus, M., et al., 2025). Learning management system procurement and development should prioritize these features over advanced capabilities that smartphone-dependent students cannot effectively utilize. (Riau, D., et al., 2023 & Schweighart, R., et al., 2024)

For instructor readiness, professional development programs should move beyond tool-focused training toward pedagogical transformation. Effective online teaching differs from effective classroom teaching in fundamental ways, not merely in delivery medium (Todri, A., et al., 2021 & Topping, K. J., 2023). Online instructors must develop skills in facilitating asynchronous discussion, providing timely written feedback, maintaining presence without physical proximity, identifying disengaged students through digital trace data, and designing assessments appropriate for remote administration. Professional development should address these distinctive competencies rather than merely teaching faculty to upload files and create discussion forums. (Grono, S., O’Neill, K., Harrington, I., & Volpe, C. (2022)

For student self-regulated learning, institutional support should be proactive rather than reactive. Rather than waiting for struggling students to seek help—which struggling students often fail to do—institutions should embed self-regulation training into required orientation courses or first-year seminars (Maypa, A. L. Z., Marcial, D. E., & Montemayor, J. O., 2023). Training content should include practical skills such as creating weekly study schedules, setting specific learning goals, monitoring progress toward goals, seeking help when stuck, managing digital distractions, and maintaining motivation during independent study. These skills benefit students across modalities but become essential for success in online environments. (Riau, D., et al., 2023 & Schweighart, R., et al., 2024)

The relative importance of the three predictors suggests a tiered improvement strategy. Institutions with severely deficient infrastructure should prioritize connectivity and platform improvements first, as technology barriers prevent effective instruction regardless of instructor quality or student skills (Grono, S., O’Neill, K., Harrington, I., & Volpe, C. (2022). Institutions with adequate infrastructure should focus on instructor professional development next, as skilled instruction can partially compensate for remaining infrastructure limitations. Institutions with both adequate infrastructure and skilled instructors should invest in student self-regulation support, as learner skills represent the final pathway to maximizing online learning effectiveness. (Todri, A., et al., 2021 & Topping, K. J., 2023)

**5.4 Challenges and Limitations**

Practical skill acquisition (Mean=2.89) remains the most significant pedagogical limitation identified. This finding aligns with previous research noting that laboratory courses, clinical rotations, and studio-based instruction present particular challenges for fully online delivery. For disciplines requiring hands-on practice, blended learning models combining online theory instruction with intensive in-person practical sessions may represent optimal approaches. (Semenova, L. A., et al., 2023 & Shakra, Z. A., 2023)

Reduced peer interaction (62.6% citing as challenge) highlights the social dimension limitations of online learning. While learning management systems support academic interactions, spontaneous informal conversations contributing to community building and collaborative learning are diminished. Institutions should intentionally design social learning opportunities including virtual study groups, discussion forums, and synchronous collaborative activities.

The practical skill acquisition challenge requires discipline-specific solutions rather than one-size-fits-all approaches. For health sciences education, options include virtual patient simulations, standardized patients via video, at-home clinical skills kits with remote observation, and intensive in-person skills boot camps supplementing online theory instruction (Kubai, E., 2023). For engineering education, options include remote laboratory access enabling equipment control via internet, simulation software replacing physical experiments, at-home project kits with common materials, and concentrated in-person laboratory sessions (Grono, S., O’Neill, K., Harrington, I., & Volpe, C. (2022). For performing arts education, options include video submission for performance critique, peer feedback through shared platforms, and periodic in-person coaching intensives (Maypa, A. L. Z., Marcial, D. E., & Montemayor, J. O., 2023). Each discipline must develop solutions appropriate to its specific learning objectives while acknowledging that some practical skills may simply require in-person instruction. (Semenova, L. A., et al., 2023 & Shakra, Z. A., 2023)

The peer interaction challenge points to social infrastructure as important as technical infrastructure. Learning management systems typically support formal academic interactions—assignment submission, grade viewing, content access—but provide limited support for informal social interaction (Kubai, E., 2023). Institutions should supplement formal platforms with tools enabling casual communication, including chat channels for off-topic discussion, virtual student lounges, interest-based groups, and social events integrated into online learning environments. Intentional design of social learning opportunities, rather than assuming spontaneous community formation, may partially address the peer interaction deficit. (Grono, S., O’Neill, K., Harrington, I., & Volpe, C. (2022)

Some reduction in peer interaction may be inevitable in online learning compared to residential campus experiences. Students who prioritize flexibility and accessibility over social benefits may accept this trade-off. Others may prefer blended models offering both online flexibility and periodic in-person social connection (Maypa, A. L. Z., Marcial, D. E., & Montemayor, J. O., 2023). The appropriate balance likely varies across student populations, with younger students perhaps valuing social interaction more highly and older students with work and family responsibilities prioritizing flexibility. (Todri, A., et al., 2021 & Topping, K. J., 2023)

**5.5 Methodological Considerations and Future Research**

This study has several limitations that should be considered when interpreting the findings. First, the cross-sectional design limits the ability to establish causal relationships between predictor variables and online learning effectiveness (Agudelo & Cortes-Gómez, 2021). Future longitudinal studies are recommended to examine how online learning experiences and outcomes evolve over time.

Second, although the sample included universities across Sumatra, it did not represent eastern Indonesian regions such as Papua, Maluku, and Nusa Tenggara, where infrastructure conditions may differ substantially. Future research should expand geographic coverage to capture Indonesia’s broader educational diversity. (Grono, S., O’Neill, K., Harrington, I., & Volpe, C. (2022)

Third, the use of self-reported GPA may introduce measurement error. Future studies should consider using official academic records or validating self-reported data against institutional records. In addition, this study focused primarily on student perceptions and GPA, which may not fully reflect educational quality (Zhong, Q., Wang, Y., Lv, W., Xu, J., & Zhang, Y., 2022). Future research should incorporate broader outcome measures, including critical thinking, creativity, communication skills, and graduate competencies. (Mitchell, C., Cours Anderson, K., Laverie, D., & Hass, A. (2021)

Finally, the study did not extensively examine variations across academic disciplines, demographic characteristics, or instructor perspectives (Riau, D., et al., 2023 & Schweighart, R., et al., 2024). Future investigations should explore discipline-specific patterns, demographic differences, and faculty experiences to provide a more comprehensive understanding of online learning effectiveness in higher education.

**6. CONCLUSION**

This study examined the effectiveness of online learning in Indonesian higher education using data from 385 students across six universities in Sumatra. The findings indicate that online learning achieves academic outcomes comparable to conventional face-to-face instruction, as no significant GPA differences were observed between the two modalities (p = 0.287).

Online learning appears particularly beneficial for lower-performing students, who demonstrated significant GPA improvement (Δ = +0.33, p < 0.001), while higher-performing students maintained their achievement levels. Furthermore, digital infrastructure quality (β = 0.348), instructor readiness (β = 0.291), and student self-regulated learning (β = 0.255) were identified as significant predictors of online learning effectiveness, collectively explaining 46.8% of the variance.

Despite its benefits, substantial urban-rural disparities in internet connectivity remain a major challenge, highlighting the need for targeted policy interventions. Overall, the findings support online learning as a viable and sustainable educational strategy, provided that adequate infrastructure, instructor preparation, and student support systems are in place (Kubai, E., 2023). Blended learning is recommended as the most effective approach, combining the flexibility of online learning with opportunities for practical skill development and social interaction.

Based on these findings, policymakers should prioritize rural internet infrastructure, establish comprehensive online learning quality standards, and support the development of mobile-friendly learning platforms (Grono, S., O’Neill, K., Harrington, I., & Volpe, C. (2022). Higher education institutions should adopt blended learning models, strengthen faculty training, and provide programs that enhance students’ self-regulated learning skills (Semenova, L. A., et al., 2023 & Shakra, Z. A., 2023). Faculty members should design mobile-accessible courses, incorporate flexible learning activities, foster student interaction, and utilize blended approaches for courses requiring practical competencies.

**Institutional Review Board Statement**

This study was conducted in accordance with the Declaration of Helsinki and received ethical approval from the Research Ethics Committees of participating universities. Informed consent was obtained from all participants prior to data collection. Participants were informed of their right to withdraw without consequence, and all data were anonymized prior to analysis.

**Declaration of Interest (Conflict of Interest)**

The authors declare no competing interests. No financial, personal, or professional relationships have influenced the design, data collection, analysis, interpretation, or writing of this manuscript. All authors have approved the final version and agree with its submission to this publication.

**Funding**

This research received no specific grant from any funding agency in the public, commercial, or not-for-profit sectors. The study was conducted as an independent academic investigation without institutional or external financial support. All costs associated with data collection, analysis, and manuscript preparation were borne solely by the authors.

**Acknowledgment**

The authors wish to express their sincere gratitude to the rectors, academic directors, and administrative staff of the six participating universities—UIN Syekh Ali Hasan Ahmad Addary Padangsidimpuan, STAIN Mandailing Natal, AKBID Negeri Sigulang, Graha Nusantara University, Universitas Muhammadiyah Tapanuli Selatan (UM Tapsel), and IPTS Padangsidimpuan—for granting access to their students and facilitating the data collection process. Special appreciation is extended to all 385 undergraduate students who voluntarily participated in this study and shared their learning experiences candidly. The authors also thank the three expert validators for their valuable feedback on the research instrument and the research assistants who supported questionnaire distribution and data entry. Finally, we acknowledge the contributions of the broader educational research community in Indonesia whose prior work laid the foundation for this investigation.

**Ethical Approval Statement**

This study was conducted in accordance with the ethical principles outlined in the Declaration of Helsinki. Ethical approval was obtained from the Research Ethics Committees of all participating universities prior to the commencement of data collection (approval numbers: ***012/EC/UIN-SHA/2024****,* ***045/EC/STAIN-MN/2024****,* ***023/EC/AKBID/2024****,* ***089/EC/GNU/2024****,* ***067/EC/UM-TAPSEL/2024****,* ***034/EC/IPTS/2024****;* full documentation available upon request). Written informed consent was secured from each participant after providing comprehensive information about the study's purpose, procedures, risks, and benefits. Participants were explicitly informed of their right to withdraw from the study at any time without negative consequences to their academic standing or institutional relationships. To ensure confidentiality, all questionnaires were anonymized, and personal identifiers were removed prior to data analysis. The data were stored on password-protected devices accessible only to the principal investigators.

**REFERENCES**

1. Agudelo, C. A. R., & Cortes-Gómez, A. M. (2021). Sustainable behaviors, prosocial behaviors, and religiosity in Colombia: A first empirical assessment. Environmental Challenges, 4, 100088. <https://doi.org/10.1016/j.envc.2021.100088>
2. Al-Fraihat, D., Joy, M., & Sinclair, J. (2020). Evaluating E-learning systems success: An empirical study. Computers in Human Behavior, 102, 67-86. <https://doi.org/10.1016/j.chb.2019.08.004>
3. Al-Fraihat, D., Joy, M., Masa’deh, R., & Sinclair, J. (2020). Evaluating E-learning systems success: An empirical study. Computers in Human Behavior, 10(2), 67–86. <https://doi.org/10.1016/j.chb.2019.08.004>
4. Alisherovna, M. N. (2025). Foundations of developing learning-cognitive activities through the implementation of modern assessment methods in the teaching process. European International Journal of Pedagogics, 5(1), 67–79. <https://doi.org/10.55640/eijp-05-01-14>
5. Al-Maroof, R. S., Alhumaid, K., Akour, I., & Salloum, S. (2021). Factors that affect e-learning platforms after the spread of COVID-19: Post acceptance study. Data, 6(5), 49–62. <https://doi.org/10.3390/data6050049>
6. Azis, Y. M., Suharyati, H., & Susanti, S. (2020). Sharing time learning (face-to-face and online learning) in blended learning. International Journal of Psychosocial Rehabilitation, 24(2), 466–474.
7. Bachtiar, B. (2025). Preparing citizens for the future of digital literacy and AI. In Digital citizenship and the future of AI engagement, ethics, and privacy (pp. 405–440). IGI Global. <https://doi.org/10.4018/979-8-3693-9015-3.ch015>
8. Badan Pusat Statistik. (2023). Statistik Indonesia 2023. Jakarta: Badan Pusat Statistik. <https://www.bps.go.id/publication/2023/11/30/>
9. Bao, W. (2020). COVID-19 and online teaching in higher education: A case study of Peking University. Human Behavior and Emerging Technologies, 2(2), 113-115. <https://doi.org/10.1002/hbe2.191>
10. Bin Mubayrik, H. F. (2020). New trends in formative-summative evaluations for adult education. SAGE Open, 10(3). <https://doi.org/10.1177/2158244020941006>
11. Boström, L., Collén, C., Damber, U., & Gidlund, U. (2021). A rapid transition from campus to emergent distant education; effects on students’ study strategies in higher education. Education Sciences, 11(11). <https://doi.org/10.3390/educsci11110721>
12. Chan, A. H., Kok, E. Y. Y., Razali, M. A. M., Lawrie, G. A., & Wang, J. T. H. (2022). Student perceptions and engagement in video-based learning for microbiology education. International Journal of Innovation in Science and Mathematics Education, 30(3), 241–254. <https://doi.org/10.30722/IJISME.30.03.001>
13. Cheah, S., & Li, S. (2020). The effect of structured feedback on performance: The role of attitude and perceived usefulness. Sustainability, 12(5), 2101–2115. <https://doi.org/10.3390/su12052101>
14. Cidral, W. A., Oliveira, T., Di Felice, M., & Aparicio, M. (2018). E-learning success determinants: Brazilian empirical study. Computers & Education, 122, 273-290. <https://doi.org/10.1016/j.compedu.2017.12.001>
15. Cidral, W. A., Oliveira, T., Di Felice, M., & Aparicio, M. (2018). E-learning success determinants: Brazilian empirical study. Computers & Education, 122, 273–299. <https://doi.org/10.1016/j.compedu.2017.12.001>
16. Colthorpe, K., Gray, H., Ainscough, L., & Ernst, H. (2021). Drivers for authenticity: student approaches and responses to an authentic assessment task. Assessment and Evaluation in Higher Education, 46(7). <https://doi.org/10.1080/02602938.2020.1845298>
17. Creswell, J. W., & Plano Clark, V. L. (2011). Designing and conducting mixed methods research. SAGE Publications.
18. Davis, F. D. (1989). Perceived usefulness, perceived ease of use, and user acceptance of information technology. MIS Quarterly, 13(3), 319-340. <https://doi.org/10.2307/249008>
19. DeLone, W. H., & McLean, E. R. (2003). The DeLone and McLean model of information systems success: A ten-year update. Journal of Management Information Systems, 19(4), 9-30. <https://doi.org/10.1080/07421222.2003.11045748>
20. Emihovich, B. (2024). Implementing universal design for learning in online courses to support multilingual students in higher education. The CATESOL Journal, 35(1), 534–547. <https://doi.org/10.5070/B5.34833>
21. Fanshawe, M., Delaney, N., & Powell, A. (2020). Utilizing instantaneous feedback to promote self-regulated learning in online higher education courses: The case for digital badges. In C. Dann & S. O’Neill (Eds.), Technology-enhanced formative assessment practices in higher education (pp. 41-59). IGI Global Scientific Publishing. <https://doi.org/10.4018/978-1-7998-0426-0.ch003>
22. Georgia, S., & Teny, H. (2025). Perbandingan kinerja KNN, SVM, dan ANN untuk memprediksi level obesitas. Jurnal Ilmu Komputer dan Sistem Informasi, 13(2), 1-9.
23. Gezani, B. (2024). Challenges of online learning in the comprehensive open distance and elearning context – a case study of the University of South Africa. E-Journal of Humanities, Arts and Social Sciences, 12(4), 1265–1274. <https://doi.org/10.38159/ehass.20245716>
24. Grono, S., O’Neill, K., Harrington, I., & Volpe, C. (2022). Building relationships through learning design as signature pedagogy: Re-connecting mature-aged online students with educators. ASCILITE Publications, 11(3), 220–233. <https://doi.org/10.14742/apubs.2022.75>
25. Heo, S., Sohn, W., Park, S., & Lee, D. K. (2024). Multi-hazard assessment for flood and landslide risk in Kalimantan and Sumatra: Implications for Nusantara, Indonesia's new capital. Heliyon, 10(19), e37789. <https://doi.org/10.1016/j.heliyon.2024.e37789>
26. Hojeij, Z., & Ayber, P. O. (2022). Effectiveness of using digital feedback on EFL student writing skills. International Journal of Computer-Assisted Language Learning and Teaching, 12(1). <https://doi.org/10.4018/IJCALLT.291111>
27. Hollingshead, A. (2021). Designing engaging online environments. In Research anthology on developing effective online learning courses (pp. 516–530). IGI Global. <https://doi.org/10.4018/978-1-7998-8047-9.ch027>
28. Hu, J., Lee, P. G., & Harji, M. A. B. (2023). Designing authentic assessment tasks for EFL courses. SHS Web of Conferences, 168. <https://doi.org/10.1051/shsconf/202316801025>
29. Ismailov, M., & Chiu, T. K. F. (2022). Catering to inclusion and diversity with universal design for learning in asynchronous online education: A self-determination theory perspective. Frontiers in Psychology, 13. <https://doi.org/10.3389/fpsyg.2022.819884>
30. Kim, Y., & Olesova, L. (2022). Expanding online professional learning in the post-COVID era: The potential of the universal design for learning framework. Journal of Applied Instructional Design, 11(2), 426–439. <https://doi.org/10.51869/112/yklo>
31. Koenka, A. C., & Anderman, E. M. (2019). Personalized feedback as a strategy for improving motivation and performance among middle school students. Middle School Journal, 50(5), 15–22. <https://doi.org/10.1080/00940771.2019.1674768>
32. Kubai, E. (2023). A critical review of the challenges facing the competency-based assessments in the competency-based curriculum in Kenya. Journal of Education and Practices, 3(3), 83–97. <https://www.researchgate.net/publication/366866610_a_critical_review_of_the_challenges_facing_the_competency_based_assessments_in_the_competency-based_curriculum_in_nairobi_county_kenya>
33. Kulu?akli, E. (2023). EFL learners’ language learning effort and autonomy in online distance education in higher education. Abant ?zzet Baysal Üniversitesi E?itim Fakültesi Dergisi, 23(1), 51–66. <https://doi.org/10.17240/aibuefd.2023..-1104227>
34. Leontyeva, I. A. (2018). Modern distance learning technologies in higher education: Introduction problems. Eurasia Journal of Mathematics, Science and Technology Education, 14(10). <https://doi.org/10.29333/ejmste/92284>
35. Lin, L., & Barber, K. A. (2022). Tapping into the potential of student engagement with universal design for learning in pedagogical courses. Excelsior: Leadership in Teaching and Learning, 14(2), 114–129. <https://doi.org/10.14305/jn.19440413.2022.14.2.04>
36. Liu, Y., & Zhang, H. (2022). Exploring the influencing factors and validity of formative assessment in online learning. Journal of Education and E-Learning Research, 9(4). <https://doi.org/10.20448/jeelr.v9i4.4288>
37. Marisa, Putri, D. A. P., Mujiono, & Jameel, A. H. (2024). Integration of artificial intelligence in e-learning: Distance education students’ responses. Jurnal Edutech Undiksha, 12(1), 186–197. <https://doi.org/10.23887/jeu.v12i1.62023>
38. Maypa, A. L. Z., Marcial, D. E., & Montemayor, J. O. (2023). Student engagement, challenges and coping mechanisms in high school online distance learning during the COVID-19 pandemic. Information Technologies and Learning Tools, 93(1), 1–13. <https://doi.org/10.33407/itlt.v93i1.5148>
39. Medeshova., Kassymova., Mutalova, Z., & Kamalova, G. (2022). Distance learning activation in higher education. European Journal of Contemporary Education, 11(3), 831–845. <https://doi.org/10.13187/ejced.2022.3.831>
40. Mitchell, C., Cours Anderson, K., Laverie, D., & Hass, A. (2021). Distance be damned: The importance of social presence in a pandemic-constrained environment. Marketing Education Review, 31(4), 294–310. <https://doi.org/10.1080/10528008.2021.1936561>
41. Mothibi, G. (2015). A meta-analysis of the relationship between e-learning and students' academic achievement. International Journal of Educational Sciences, 10(3), 401-410. <https://doi.org/10.1080/09751122.2015.11890367>
42. Nadeak, B. (2020). The effectiveness of distance learning using social media during the COVID-19 pandemic. Jurnal Pendidikan dan Konseling, 2(1), 34-43. [https://journal.universitaspahlawan.ac.id](https://journal.universitaspahlawan.ac.id/)
43. Neroni, J., Meijs, C., Gijselaers, H. J. M., Kirschner, P. A., & de Groot, R. H. M. (2019). Learning strategies and academic performance in distance education. Learning and Individual Differences, 73(4), 1–9. <https://doi.org/10.1016/j.lindif.2019.04.007>
44. Oyetade, K., Harmse, A., & Zuva, T. (2023). Factors influencing students’ use of e-learning technologies. International Journal of Learning, Teaching and Educational Research, 22(9), 617–632. <https://doi.org/10.26803/ijlter.22.9.33>
45. Pariyanto, Abdullah, S., Nugroho, M., Barata, F. A., Pramesti, T., Putri, E. P., Ahmad, B., Akrim, & Rudianto. (2025). From classroom to screen: Examining academic achievement in Indonesian students' transition to online learning in pre- and post-pandemic. Pertanika Journal of Social Sciences and Humanities, 33(1), 465-481. <https://doi.org/10.47836/pjssh.33.1.21>
46. Prawisanthi, T. A., Dewi, N. L. P. E. S., Paramartha, A. A. G. Y., & Wahyuni, L. G. E. (2023). The implementation of English teachers’ authentic assessment in junior high schools. International Journal of Language and Literature, 5(4). <https://doi.org/10.23887/ijll.v5i4.31865>
47. Qassrawi, R. (2022). Education 3.0 underpinned with the heutagogical approach for a smooth shift to distance learning in higher education. International Journal of Education and Practice, 11(1), 1–13. <https://doi.org/10.18488/61.v11i1.3238>
48. Riau, D., Darmanto, E., & Bachtiar, B. (2023). Enhancing distance learning: A framework for e-learning strategy and assessment at Universitas Terbuka Indonesia. Edumaspul: Jurnal Pendidikan, 7, 3187–3198. <https://doi.org/10.33487/edumaspul.v7i2.6886>
49. Schweighart, R., Hast, M., Pampel, A. M., Rebien, J. A., & Trautwein, C. (2024). Transition into distance education: A scoping review. Education Sciences, 14(10), 1130–1143. <https://doi.org/10.3390/educsci14101130>
50. Semenova, L. A., Kazantseva, A. I., Suleimenova, G. A., Kairbekova, B. D., & Sadirbaeva, K. K. (2023). Improving the quality of distance education of future teachers. World Journal on Educational Technology: Current Issues, 15(1), 132–143. <https://doi.org/10.18844/wjet.v15i1.8675>
51. Sewandono, R. E., Thoyib, A., Hadiwidjojo, D., & Rofiq, A. (2023). Performance expectancy of e-learning on higher institutions of education under uncertain conditions: Indonesia context. Education and Information Technologies, 28, 4041-4068.
52. Shakra, Z. A. (2023). Feedback as scaffolded instruction in the assessment of L2 writing tasks. European Scientific Journal, ESJ, 19(29), 57–72. <https://doi.org/10.19044/esj.2023.v19n29p57>
53. Siemens, G. (2005). Connectivism: A learning theory for the digital age. International Journal of Instructional Technology and Distance Learning, 2(1), 3-10. <http://www.itdl.org/Journal/Jan_05/article01.htm>
54. Spitzer, M. W. H., & Musslick, S. (2021). Academic performance of K-12 students in an online-learning environment for mathematics. Frontiers in Education, 6, 672-685.
55. Surbakti, R., Umboh, S. E., Pong, M., & Dara, S. (2024). Cognitive load theory: Implications for instructional design in digital classrooms. International Journal of Educational Narratives, 2(6), 483–493. <https://doi.org/10.70177/ijen.v2i6.1659>
56. Svihus, C. L. (2024). Online teaching in higher education during the COVID-19 pandemic. Education and Information Technologies, 29(3), 3175–3193. <https://doi.org/10.1007/s10639-023-11971-7>
57. Todri, A., Papajorgji, P., Moskowitz, H., & Scalera, F. (2021). Perceptions regarding distance learning in higher education, smoothing the transition. Contemporary Educational Technology, 13(1), 1–13. <https://doi.org/10.30935/cedtech/9274>
58. Topping, K. J. (2023). Advantages and disadvantages of online and face-to-face peer learning in higher education: A review. Education Sciences, 13(4). <https://doi.org/10.3390/educsci13040326>
59. UNESCO. (2020). COVID-19 educational disruption and response. Paris: UNESCO Publishing. <https://en.unesco.org/covid19/educationresponse>
60. Vlachopoulos, D., & Makri, A. (2019). Online communication and interaction in distance higher education: A framework study of good practice. International Review of Education, 65(4). <https://doi.org/10.1007/s11159-019-09792-3>
61. Warren, S. J., & Churchill, C. (2022). Strategic, operations, and evaluation planning for higher education distance education. Distance Education, 43(2), 239–270. <https://doi.org/10.1080/01587919.2022.2064821>
62. Weru, N. (2023). The role of instructors support and feedback on the performance of online and distance learning. International Journal of Online and Distance Learning, 4(1), 35–46. <https://doi.org/10.47604/ijodl.2001>
63. Winarno, Komalasari, K., & Indrawadi, J. (2023). Authentic assessment in online learning to develop students’ character. Kasetsart Journal of Social Sciences, 44(4). <https://doi.org/10.34044/j.kjss.2023.44.4.13>
64. Wong, J. Y., Azam, A. B., Cao, Q., Huang, L., Xie, Y., Winkler, I., & Cai, Y. (2024). Evaluations of virtual and augmented reality technology-enhanced learning for higher education. Electronics, 13(8), 1549–1563. <https://doi.org/10.3390/electronics13081549>
65. Yunus, M., & Bachtiar, B. (2025). Beyond access: Reframing engagement, assessment, and feedback in open and distance learning at Universitas Terbuka. International Journal of Learning, Teaching and Educational Research, 24(6), 562–587. <https://doi.org/10.26803/ijlter.24.6.26>
66. Yunus, M., & Bachtiar, B. (2025). Exploring the complexities of thesis writing in the distance mode: postgraduate students’ perspectives, challenges and strategies. Asian Association of Open Universities Journal, 20(1). <https://doi.org/10.1108/AAOUJ-07-2024-0099>
67. Yunus, M., & Bachtiar. (2025). Beyond access: Reframing engagement, assessment, and feedback in open and distance learning at Universitas Terbuka. International Journal of Learning, Teaching and Educational Research, 24(6), 562-587. <https://doi.org/10.26803/ijlter.24.6.26>
68. Zhong, Q., Wang, Y., Lv, W., Xu, J., & Zhang, Y. (2022). Self-regulation, teaching presence, and social presence: predictors of students’ learning engagement and persistence in blended synchronous learning. Sustainability, 14(9), 561–575. <https://doi.org/10.3390/su14095619>
